# Supplementary material for: Pupal Diapause Termination and Transcriptional Response of Antheraea pernyi (Lepidoptera: Saturniidae) Triggered by 20-Hydroxyecdysone
Source: Front Physiol. 2022 May 26;13:888643. doi: 10.3389/fphys.2022.888643 (PMC9204484; doi:10.3389/fphys.2022.888643)
Supplement: Supplementary file 15 [file Table7.XLSX]

## Sheet: Table S6
Table S7 The genes in Profile 16 are enriched in FOXO signaling pathway.
Name	GeneID	0dpi	1dpi	3dpi	6dpi	9dpi	Nr_desc	KEGG_ANNOT	KEGG_pathway	GO_MF	GO_BP	GO_CC
FoxO	GWHGABGR005989	13.4661	19.3394	13.8669	11.1624	6.57016	box sub-group O [Bombyx mori]	K09408 FOXO3; forkhead box protein O3	ko04068:FoxO signaling pathway;ko04151:PI3K-Akt signaling pathway;ko04152:AMPK signaling pathway;ko04137:Mitophagy - animal;ko04218:Cellular senescence;ko04062:Chemokine signaling pathway;ko04917:Prolactin signaling pathway;ko04722:Neurotrophin signaling pathway;ko04361:Axon regeneration;ko04211:Longevity regulating pathway;ko04212:Longevity regulating pathway - worm;ko04213:Longevity regulating …	GO:0003700;GO:0043565;	GO:0006355;	GO:0005634;
Pl3K	GWHGABGR006408	15.99	25.114	20.6709	17.3317	12.6013	3-kinase 60 [Bombyx mori] gt;gi|186898235|gb|ACC94001.1| phosphatidylinositol 3-kinase 60 [Bombyx mori]	K02649 PIK3R1_2_3; phosphoinositide-3-kinase regulatory subunit alpha/beta/delta	ko04014:Ras signaling pathway;ko04015:Rap1 signaling pathway;ko04012:ErbB signaling pathway;ko04370:VEGF signaling pathway;ko04630:JAK-STAT signaling pathway;ko04668:TNF signaling pathway;ko04066:HIF-1 signaling pathway;ko04068:FoxO signaling pathway;ko04070:Phosphatidylinositol signaling system;ko04072:Phospholipase D signaling pathway;ko04071:Sphingolipid signaling pathway;ko04024:cAMP signalin…	GO:0016301;GO:0035014;	GO:0043551;	GO:0005942;
PDK	GWHGABGR013782	51.711	121.822	85.5314	55.5643	45.7827	3-phosphoinositide-dependent protein kinase 1 isoform X1 [Bombyx mori]	K06276 PDPK1; 3-phosphoinositide dependent protein kinase-1 [EC:2.7.11.1]	ko04011:MAPK signaling pathway - yeast;ko04068:FoxO signaling pathway;ko04071:Sphingolipid signaling pathway;ko04151:PI3K-Akt signaling pathway;ko04152:AMPK signaling pathway;ko04150:mTOR signaling pathway;ko04140:Autophagy - animal;ko04210:Apoptosis;ko04510:Focal adhesion;ko04660:T cell receptor signaling pathway;ko04664:Fc epsilon RI signaling pathway;ko04910:Insulin signaling pathway;ko03320:P…	GO:0004674;GO:0005524;	GO:0006468;	NA
IKK	GWHGABGR013982	8.92142	13.6514	12.1137	9.56047	10.3437	Inhibitor of nuclear factor kappa B kinase beta subunit [Operophtera brumata]	K07209 IKBKB, IKKB; inhibitor of nuclear factor kappa-B kinase subunit beta [EC:2.7.11.10]	ko04014:Ras signaling pathway;ko04010:MAPK signaling pathway;ko04064:NF-kappa B signaling pathway;ko04668:TNF signaling pathway;ko04068:FoxO signaling pathway;ko04151:PI3K-Akt signaling pathway;ko04150:mTOR signaling pathway;ko04210:Apoptosis;ko04620:Toll-like receptor signaling pathway;ko04624:Toll and Imd signaling pathway;ko04621:NOD-like receptor signaling pathway;ko04622:RIG-I-like receptor …	GO:0004672;GO:0005524;	GO:0006468;	NA
ILP	GWHGABGR018127	0	0.0354693	0	0	0	Insulin like peptide [Bombyx mori]	K04526 INS; insulin	ko04014:Ras signaling pathway;ko04015:Rap1 signaling pathway;ko04010:MAPK signaling pathway;ko04066:HIF-1 signaling pathway;ko04068:FoxO signaling pathway;ko04072:Phospholipase D signaling pathway;ko04022:cGMP-PKG signaling pathway;ko04151:PI3K-Akt signaling pathway;ko04152:AMPK signaling pathway;ko04150:mTOR signaling pathway;ko04140:Autophagy - animal;ko04114:Oocyte meiosis;ko04810:Regulation o…	GO:0005179;GO:0008083;	NA	GO:0005615;
MMP	GWHGABGR014637	20.0946	176.807	104.653	57.5418	18.9264	matrix metalloproteinase-14 [Manduca sexta]	K07763 MMP14; matrix metalloproteinase-14 (membrane-inserted) [EC:3.4.24.80]	ko04668:TNF signaling pathway;ko04912:GnRH signaling pathway;ko04928:Parathyroid hormone synthesis, secretion and action;ko01002:Peptidases and inhibitors;	GO:0004222;GO:0005509;GO:0008270;	GO:0006508;	GO:0031012;
Bmm	GWHGABGR005848	9.14093	17.795	14.4352	17.8774	29.0008	triglyceride lipase [Manduca sexta]	K16816 PNPLA2, ATGL; patatin-like phospholipase domain-containing protein 2 [EC:3.1.1.3]	ko00561:Glycerolipid metabolism;ko04923:Regulation of lipolysis in adipocytes;ko04714:Thermogenesis;	NA	GO:0006629;	NA
CPA	GWHGABGR016514	8.38249	183.684	226.576	59.2607	145.607	fluid carboxypeptidase A precursor [Bombyx mori] gt;gi|54114893|dbj|BAD60916.1| molting fluid carboxypeptidase A [Bombyx mori]	K08637 CPA4; carboxypeptidase A4 [EC:3.4.17.-]	ko01002:Peptidases and inhibitors;	GO:0004181;GO:0008270;	GO:0006508;	NA
